# Supplementary material for: Batch effects removal for microbiome data via conditional quantile regression
Source: PubMed Central journal article supplement (PMC9477887; doi:10.1038/s41467-022-33071-9), 2022-09-15
Supplement: 41467_2022_33071_MOESM1_ESM.pdf [file 41467_2022_33071_MOESM1_ESM.pdf]

# Supplementary information of “Batch effects removal for microbiome data via conditional quantile regression”

Wodan Ling, Jiuyao Lu, Ni Zhao\*, Anju Lulla, Anna M. Plantinga, Weijia Fu, Angela Zhang, Hongjiao Liu, Hoseung Song, Zhigang Li, Jun Chen, Timothy W. Randolph, Wei Li A. Koay, James R. White, Lenore J. Launer, Anthony A. Fodor, Katie A. Meyer, and Michael C. Wu\*

## Additional details of methods

### Conditional quantiles of microbial counts $Y_i$ .

By Model (2), we model a fine sequence of conditional quantiles of  $W_i|Y_i > 0$ . Due to the one-to-one relationship between quantiles of  $W_i|Y_i > 0$  and quantiles of  $Y_i|Y_i > 0^1$ , together with Model (1), we have the entire conditional quantile function of  $Y_i$  piecewise defined,

$$Q_{Y_i}(\tau|\mathbf{X}_i) = I\{\tau > 1 - \pi(\boldsymbol{\theta}^L, \mathbf{X}_i)\} \cdot [\mathbf{X}_i^T \boldsymbol{\theta}^Q \circ \Gamma(\tau; \mathbf{X}_i, \boldsymbol{\theta}^L) - 1], \quad (\text{Supp. 1})$$

where  $\pi(\boldsymbol{\theta}^L, \mathbf{X}_i) = P(Y_i > 0|\mathbf{X}_i)$  and  $\Gamma(\tau; \mathbf{X}_i, \boldsymbol{\theta}^L): (1 - \pi(\boldsymbol{\theta}^L, \mathbf{X}_i), 1) \rightarrow (0, 1)$  is a one-to-one mapping from the target quantile level  $\tau$  of  $Y_i$  to the nominal quantile level  $\tau_s$  of  $W_i|Y_i > 0$  in Model (2). Specifically, for a  $\tau$  below the change point  $\pi(\boldsymbol{\theta}^L, \mathbf{X}_i)$ , the outcome  $Y_i$  falls in the “absence range”, thus its corresponding quantile is zero. For a  $\tau$  beyond the change point,  $\Gamma(\tau; \mathbf{X}_i, \boldsymbol{\theta}^L)$  tells which quantile of  $W_i|Y_i > 0$  determine the value of  $Y_i$  at  $\tau$ . Mathematically,

$$\boldsymbol{\theta}^Q \circ \Gamma(\tau; \mathbf{X}_i, \boldsymbol{\theta}^L) = \boldsymbol{\theta}^Q(\tau_s), \tau_s = \Gamma(\tau; \mathbf{X}_i, \boldsymbol{\theta}^L) = \frac{\tau - \{1 - \pi(\boldsymbol{\theta}^L, \mathbf{X}_i)\}}{\pi(\boldsymbol{\theta}^L, \mathbf{X}_i)},$$

and the mapping is derived by

$$\begin{aligned} \tau &= P\{Y_i \leq Q_{Y_i}(\tau|\mathbf{X}_i)|\mathbf{X}_i\} \\ &= \{1 - \pi(\boldsymbol{\theta}^L, \mathbf{X}_i)\} + \pi(\boldsymbol{\theta}^L, \mathbf{X}_i)P\{W_i \leq [Q_{W_i}(\tau_s|\mathbf{X}_i, Y_i > 0) - 1] + U|\mathbf{X}_i, Y_i > 0\}. \end{aligned}$$

Apart from the characteristics mentioned in the manuscript, another merit of the two-part quantile regression model is that it allows nonlinear associations between quantiles of  $Y_i$  and the covariates  $\mathbf{X}_i$ , though the logit of probability being present, and every quantile of the non-zero part are modelled by linear models. To give a concrete example, suppose that for one subject, the true likelihood of the investigated taxon being present in his gut (from Model

(1)) is  $\pi = 0.8$ . Based on the mapping function above, the conditional median abundance of this taxon is determined by the  $\tau_s = \frac{0.5-(1-0.8)}{0.8} = 0.38$ th quantile of  $W_i$ . If we change his assignment from placebo to treatment, how would the conditional median of the taxon abundance change accordingly? Suppose the true probability of having the taxon increases to  $\pi = 0.9$  after he receives treatment. The conditional median would then be determined by the  $\tau_s = \frac{0.5-(1-0.9)}{0.9} = 0.44$ th quantile of  $W_i$ . The difference in conditional median is thus nonlinear, which is a composite effect from the two parts.

### Piecewise estimation strategy.

Parameters of the two-part model (1)(2) can be readily estimated by regressing  $I(Y_i > 0)$  on  $\mathbf{X}_i$  using logistic regression and regressing the non-zero  $Y_i$  on the corresponding  $\mathbf{X}_i$  using linear quantile regression. As the variance of quantile regression estimate is inverse proportional to the local density, i.e.,  $\text{var}\{\hat{\boldsymbol{\theta}}^Q(\tau)\} \rightarrow \infty$  as  $\tau \rightarrow 0$ , the quantile estimate is not stable at the change point  $1 - \pi(\boldsymbol{\theta}^L, \mathbf{X}_i)$ , and might blow up to a value with extraordinarily large magnitude. To achieve a reliable estimation of the conditional quantile function  $\hat{Q}$ , we use a piecewise strategy:

1. Estimate the probability of presence,  $\pi(\hat{\boldsymbol{\theta}}^L, \mathbf{X}_i) = \exp(\mathbf{X}_i^T \hat{\boldsymbol{\theta}}^L) / \{1 + \exp(\mathbf{X}_i^T \hat{\boldsymbol{\theta}}^L)\}$
2. Select a constant  $\delta \in (0, \frac{1}{2})$ , divide the support of the target quantile levels  $(0,1)$  of  $Y_i$  into three sub-intervals:

$$\begin{aligned} A_n &= \{\tau: 0 < \tau < 1 - \pi(\hat{\boldsymbol{\theta}}^L, \mathbf{X}_i)\}, \\ B_n &= \{\tau: 1 - \pi(\hat{\boldsymbol{\theta}}^L, \mathbf{X}_i) \leq \tau \leq 1 - \pi(\hat{\boldsymbol{\theta}}^L, \mathbf{X}_i) + n^{-\delta}\}, \\ C_n &= \{\tau: 1 - \pi(\hat{\boldsymbol{\theta}}^L, \mathbf{X}_i) + n^{-\delta} < \tau < 1\}. \end{aligned}$$

3. If  $\tau$  is in  $B_n$ , estimate the quantile coefficients  $\hat{\boldsymbol{\theta}}^Q$  at the nominal quantile level  $\Gamma(1 - \pi(\hat{\boldsymbol{\theta}}^L, \mathbf{X}_i) + n^{-\delta}; \mathbf{X}_i, \hat{\boldsymbol{\theta}}^L)$  and perform an interpolation between the quantile estimate and 1, which is the natural lower bound for microbial read count, at the change point  $1 - \pi(\hat{\boldsymbol{\theta}}^L, \mathbf{X}_i)$ . Pick the interpolated value at  $\tau$ . If  $\tau$  is in  $C_n$ , estimate the  $\hat{\boldsymbol{\theta}}^Q$  at  $\Gamma(\tau; \mathbf{X}_i, \hat{\boldsymbol{\theta}}^L)$  directly. If linear interpolation is used, the estimation of  $\hat{Q}$  is shown as Supp. Fig. 1, and mathematically is

$$\begin{aligned}
\hat{Q} &= 0 \cdot I(\tau \in A_n) \\
&+ \left[ \{\mathbf{X}_i^T \hat{\boldsymbol{\theta}}^Q \circ \Gamma(1 - \pi(\hat{\boldsymbol{\theta}}^L, \mathbf{X}_i) + n^{-\delta}; \mathbf{X}_i, \hat{\boldsymbol{\theta}}^L) - 1\} \cdot \frac{\tau - \{1 - \pi(\hat{\boldsymbol{\theta}}^L, \mathbf{X}_i)\}}{n^{-\delta}} \right] \cdot I(\tau \in B_n) \\
&+ [\mathbf{X}_i^T \hat{\boldsymbol{\theta}}^Q \circ \Gamma(\tau; \mathbf{X}_i, \hat{\boldsymbol{\theta}}^L) - 1] \cdot I(\tau \in C_n) \quad (\text{Supp. 2})
\end{aligned}$$

Intuitively, the buffer zone  $B_n$  avoids the need to estimate the minimal quantiles of the non-zero part, preventing an explosive estimate around the zero-positive change point. The width of  $B_n$ ,  $n^{-\delta}$ , is designed to converge more slowly than the logistic estimates, so the buffer will work and  $\hat{Q}$  is bounded and reliable almost surely. The consistency of  $\hat{Q}$  can be found elsewhere<sup>2</sup>. Other smooth methods can be used instead of the linear interpolation, to further control the estimate around the change point. There is a tradeoff when determining the width of  $B_n$ . A wider  $B_n$  controls the estimates well but the longer interpolation introduces more biases. While if  $B_n$  is too narrow, the estimates close to the change point might not be properly controlled. Practically, when the sample size is reasonably large, we use a value approaching  $\frac{1}{2}$  as  $\delta$ , such as 0.499. As a complement to Fig. 1b, the matching process on the piecewise estimated conditional quantile functions is depicted in Supp. Fig. 2.

However, when the sample size is severely limited, we might opt to omit the buffer zone  $B_n$  in estimation. A small sample size leads to a wide  $B_n$ , then the interpolation in  $B_n$  will induce substantial biases. In such extreme cases, reducing the biases is our primary goal, instead of controlling the explosive estimates that might occur.

## Figures and tables

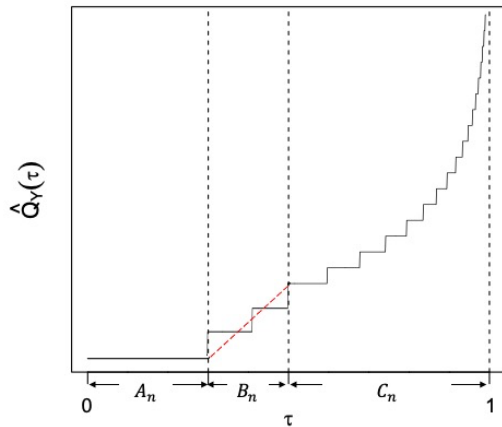

Supp. Fig. 1 | Piecewise estimation of conditional quantile function.

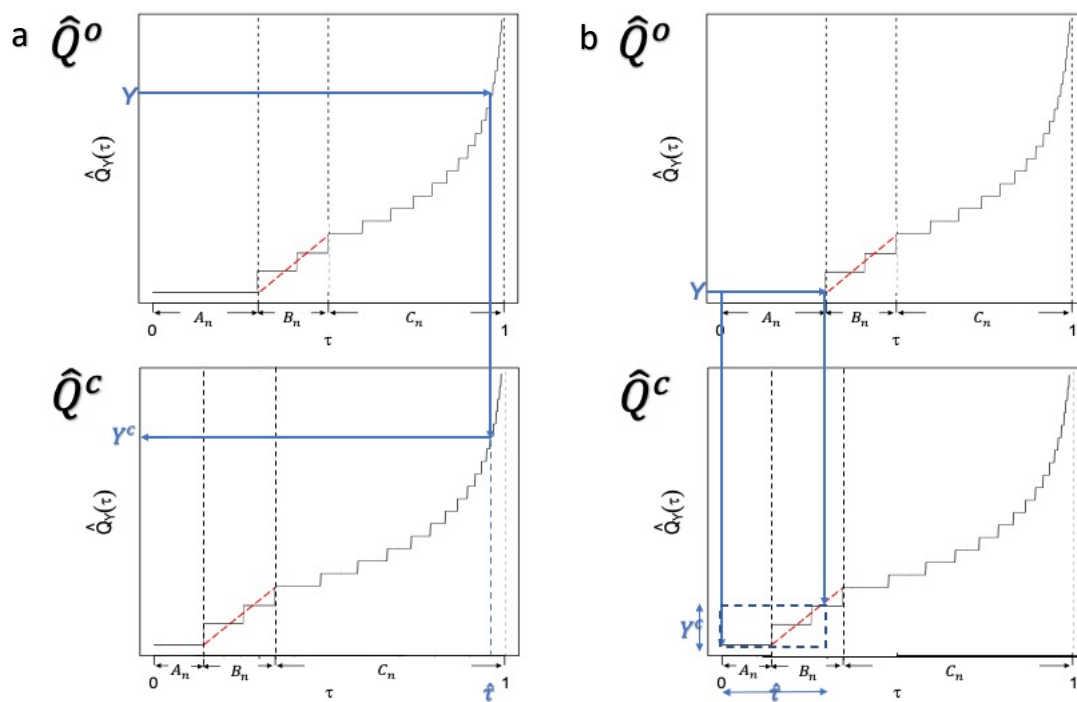

Supp. Fig. 2 | Correction with conditional quantile functions. **a**, Converting a non-zero count to the corrected non-zero count at the same quantile level. **b**, Converting a zero count to a non-zero count when the batch-free distribution is less sparse. Rounded average of all matched quantiles in the batch-free distribution is taken as the adjusted read count.

**a**

I. Simulate Metadata

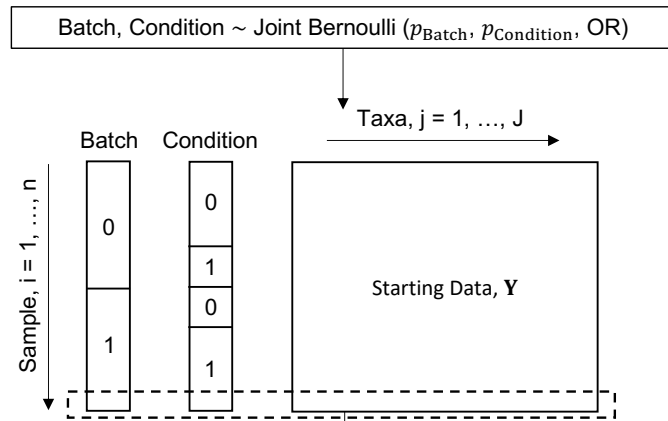

II. Simulate Taxa Read Counts

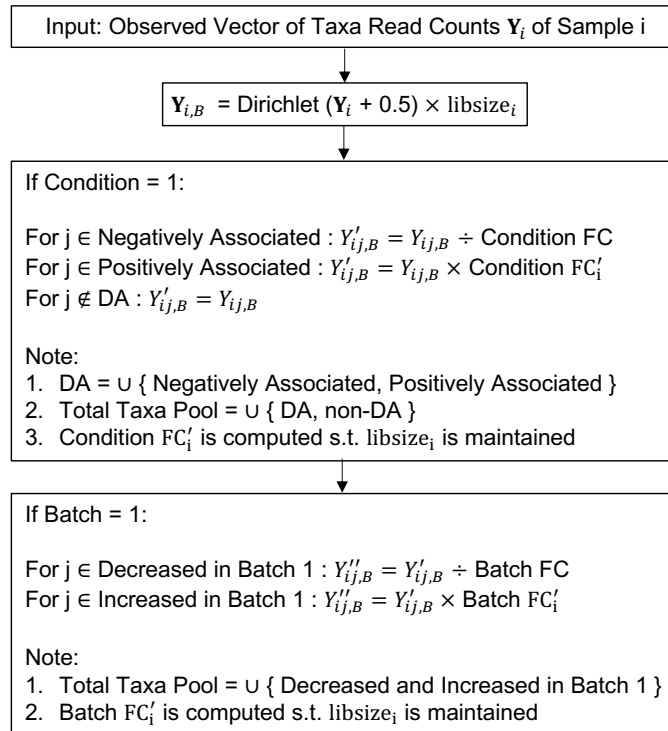

**b**

Zero Rate of 20 Chosen Differentially Abundant Taxa

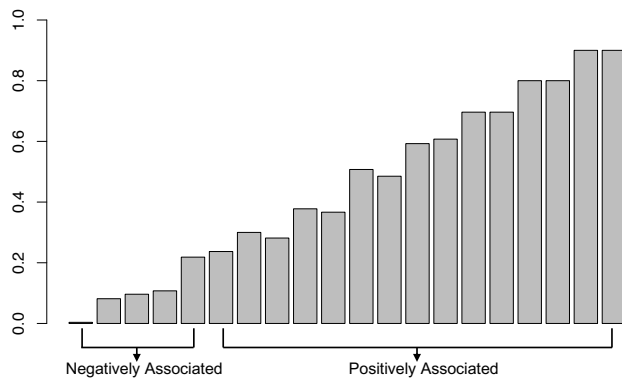

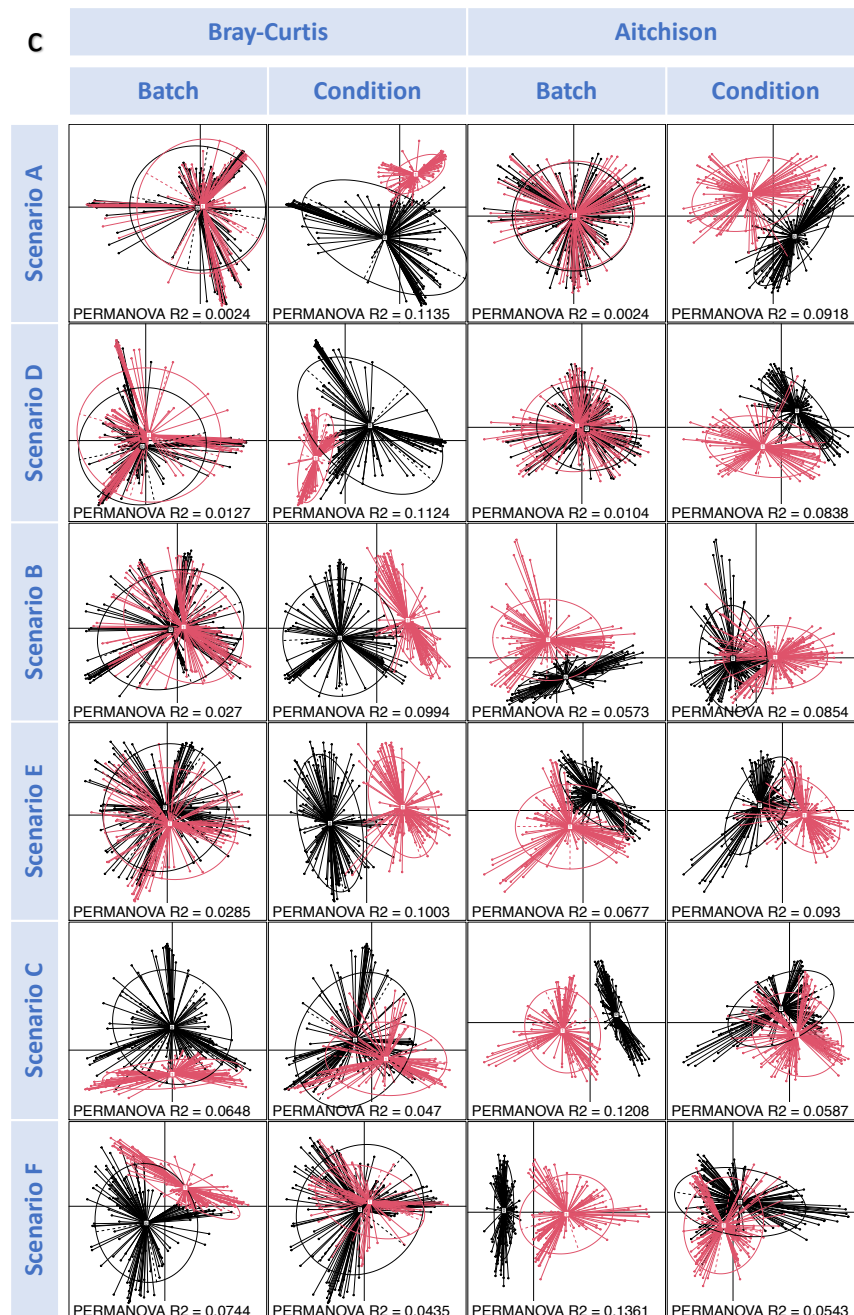

**Supp. Fig. 3 | Simulation setting, workflow, and visualization of simulated data. a,**

Workflow of generating simulated data based on the starting data. Specification of fold change (FC) and odds ratio (OR) are provided in Results – Evaluation on simulated data.

Rounded  $Y''_{ij,B}$  is the simulated (bootstrapped) count of the j-th taxon in the i-th sample. The starting data only comprises the subset of MOMS-PI with body\_site = vaginal and visit = 4, and with samples having less than 4000 library size and rare taxa presenting in less than 5% samples filtered out. **b,** Zero rates of the 20 chosen DA taxa in the starting data. The most abundant 5 taxa in the 20 are set to be negatively associated with Condition, because if they are set to be positively associated, their multiplied counts will be too large to maintain

libsize. **c**, PCoA plots of one simulated data for each of the six scenarios. In either Bray-Curtis or Aitchison dissimilarity, the visualization and PERMANOVA  $R^2$  clearly show the three patterns, Null (Scenario A), Condition Effect  $>$  Batch Effect (Scenario B), and Condition Effect  $<$  Batch Effect (Scenario C). Scenario D, E, and F show similar patterns, respectively, with increased Batch Effect incorporating library size variability.

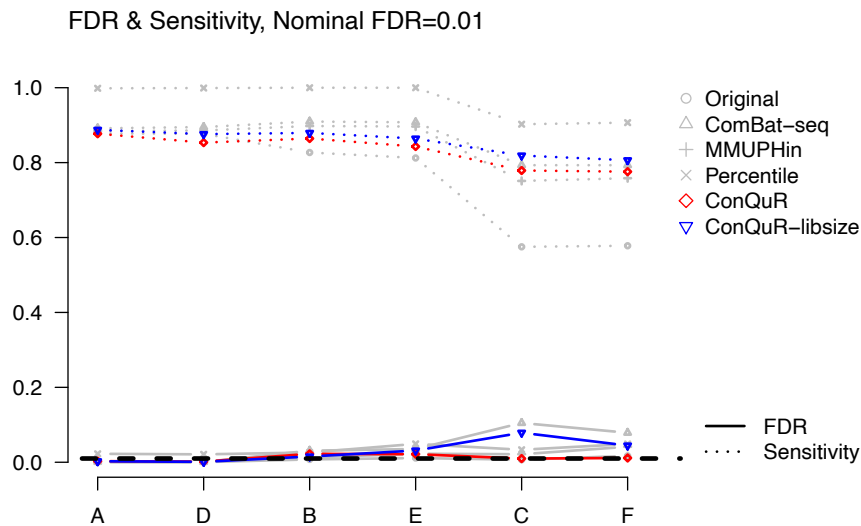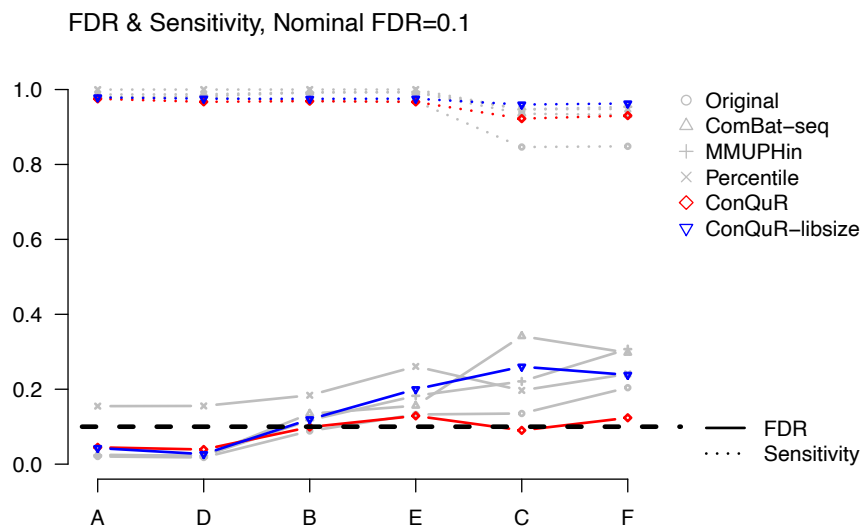

**Supp. Fig. 4 | False discovery rate (FDR) and sensitivity of association analysis between taxa relative abundance and Condition, with additional nominal FDR cutoffs.** In the plots, the scenarios are arranged on the x-axis with the order A, D, B, E, C, F because the two

Nulls are allocated together, followed by Condition Effect > Batch Effect, and then Condition Effect < Batch Effect. Color and the name of the corresponding method are shown on the right within the graph. The solid line is FDR and the dashed line is sensitivity. Approaches with FDR attained around the nominal level 0.01 or 0.1 are valid, then among the valid approaches, the higher sensitivity is preferred.

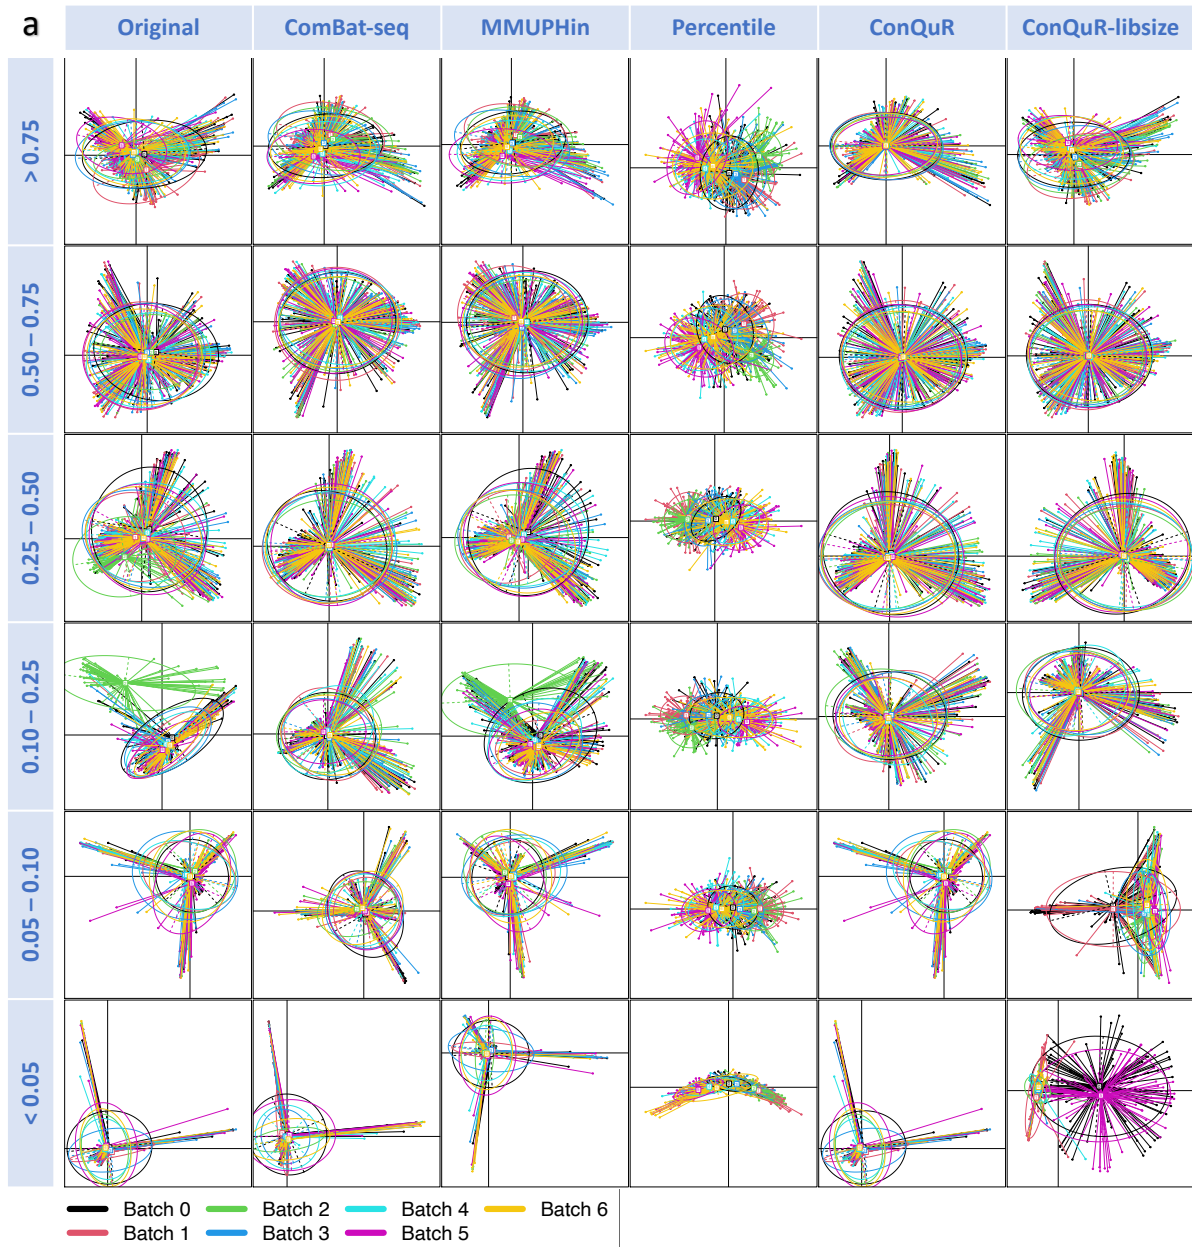



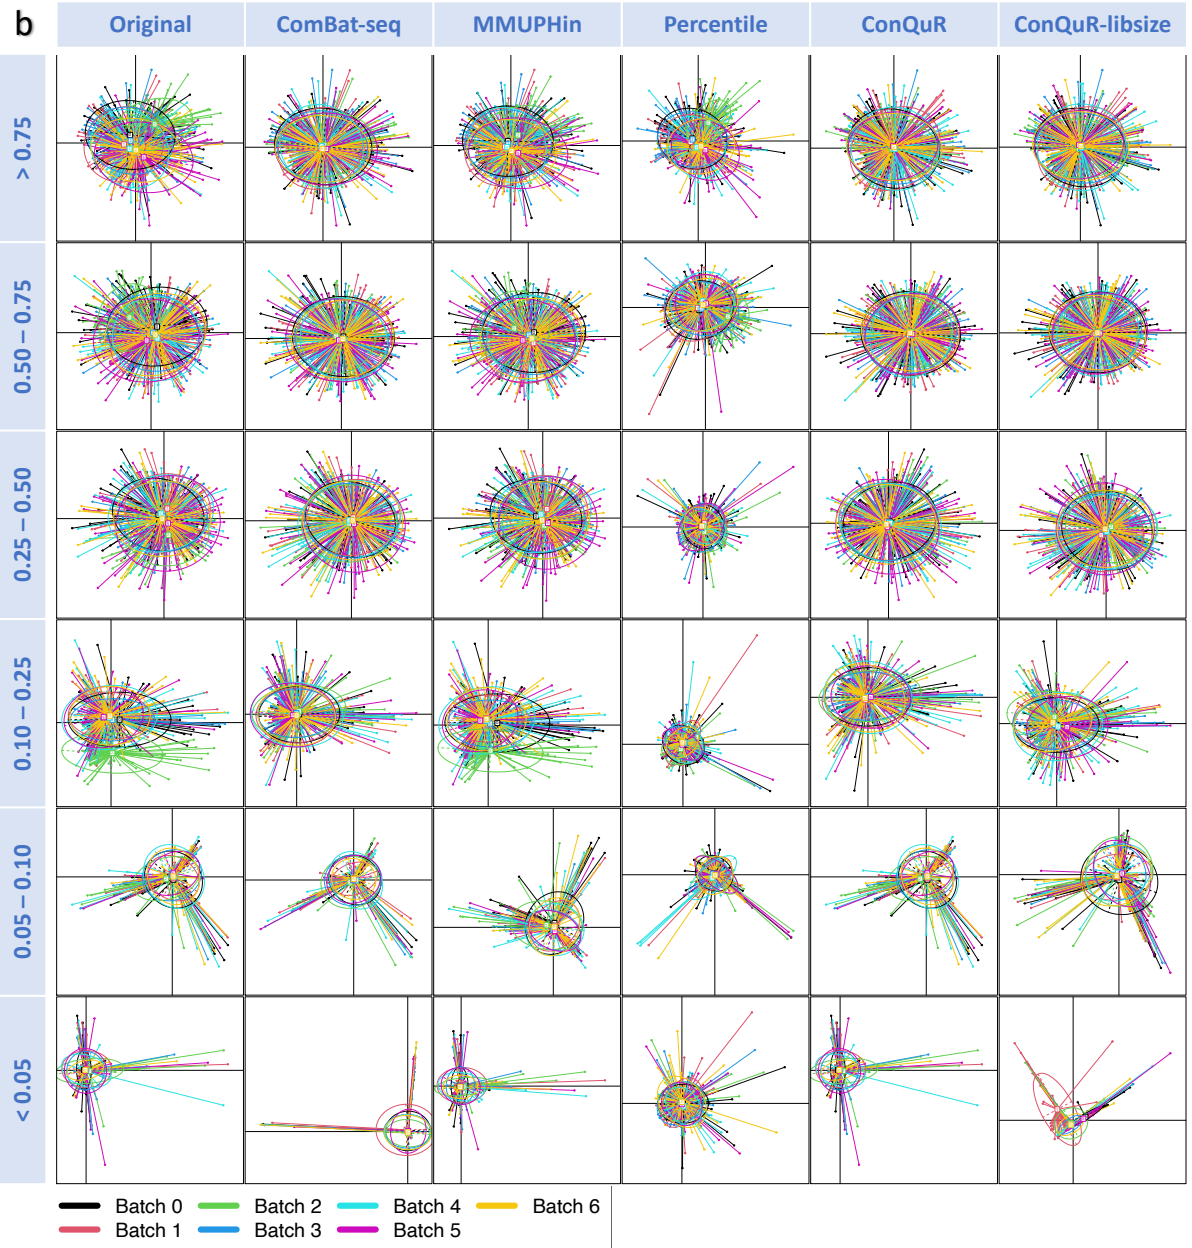

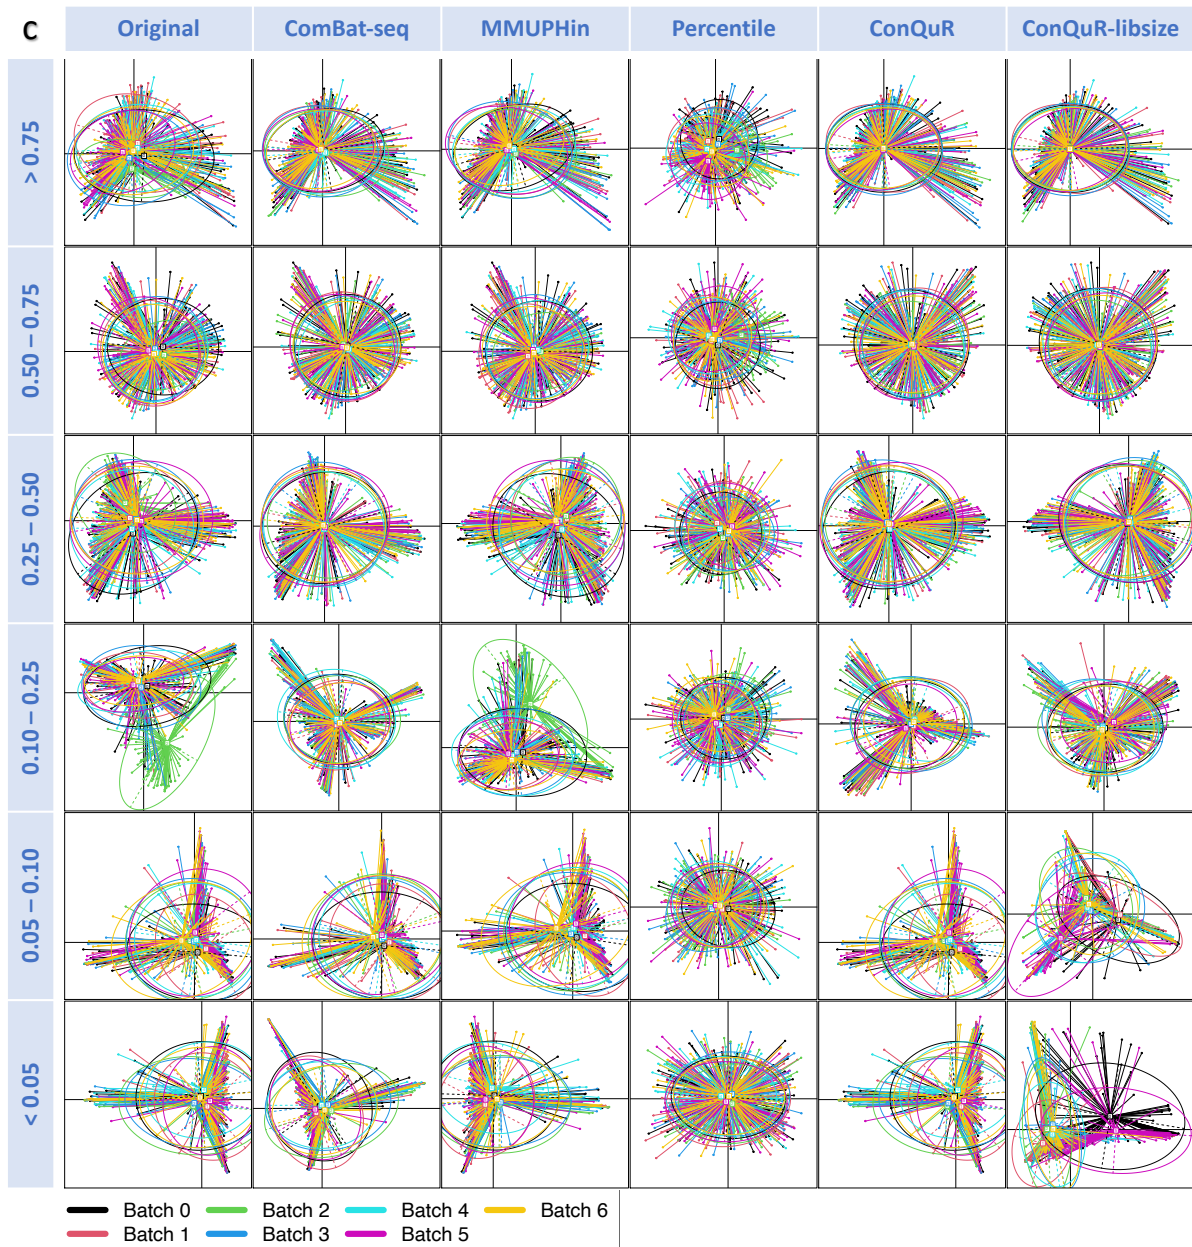

**Supp. Fig. 5 | PCoA plots of CARDIA data clustered by batch ID on taxa with different prevalence.** Corresponding colors of the batches are shown at the bottom within the graph, **a**, by Bray-Curtis dissimilarity on raw counts of taxa with prevalence >0.75, 0.5-0.75, 0.25-0.5, 0.1-0.25, 0.05-0.1, <0.05. Each point represents a sample with non-zero abundance for the taxa (note that fewer samples will have non-zero abundance for rarer taxa). Each ellipse represents a batch with the centroid indicating the mean. As an ellipse connects the 95% percentile of points for each batch, the size of the ellipse indicates the dispersion, and the angle indicates higher-order features of the batch. The more alignment of the ellipses is preferred. **b**, by Aitchison dissimilarity on the corresponding relative abundance of taxa with prevalence >0.75, 0.5-0.75, 0.25-0.5, 0.1-0.25, 0.05-0.1, <0.05. **c**, by GUniFrac dissimilarity

on the corresponding relative abundance of taxa with prevalence  $>0.75$ ,  $0.5-0.75$ ,  $0.25-0.5$ ,  $0.1-0.25$ ,  $0.05-0.1$ ,  $<0.05$ .

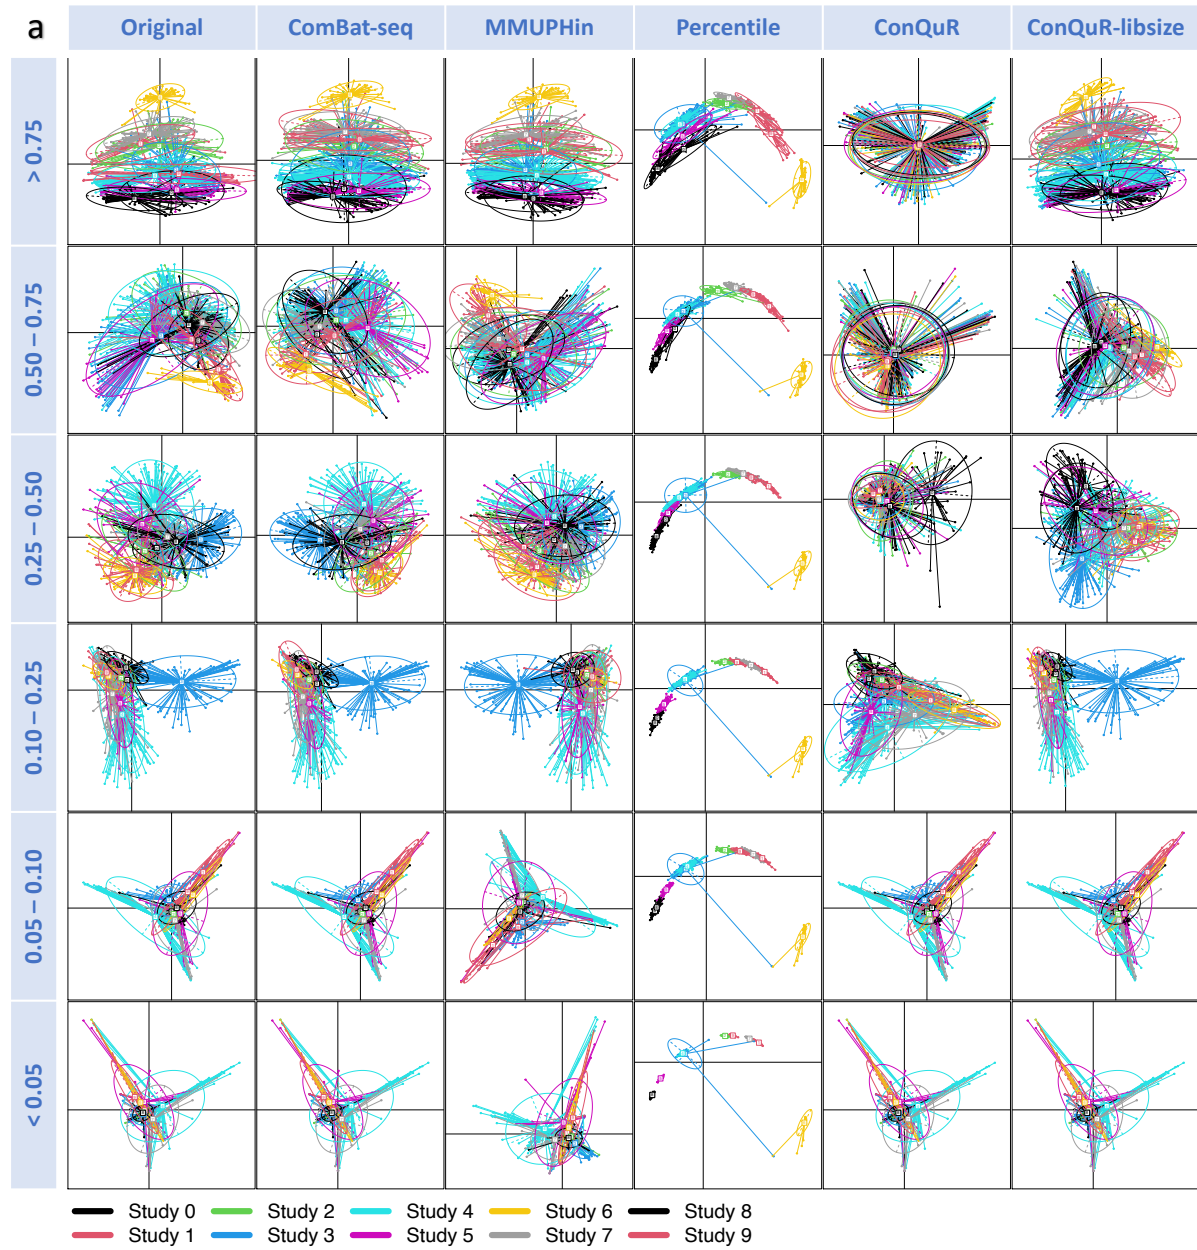

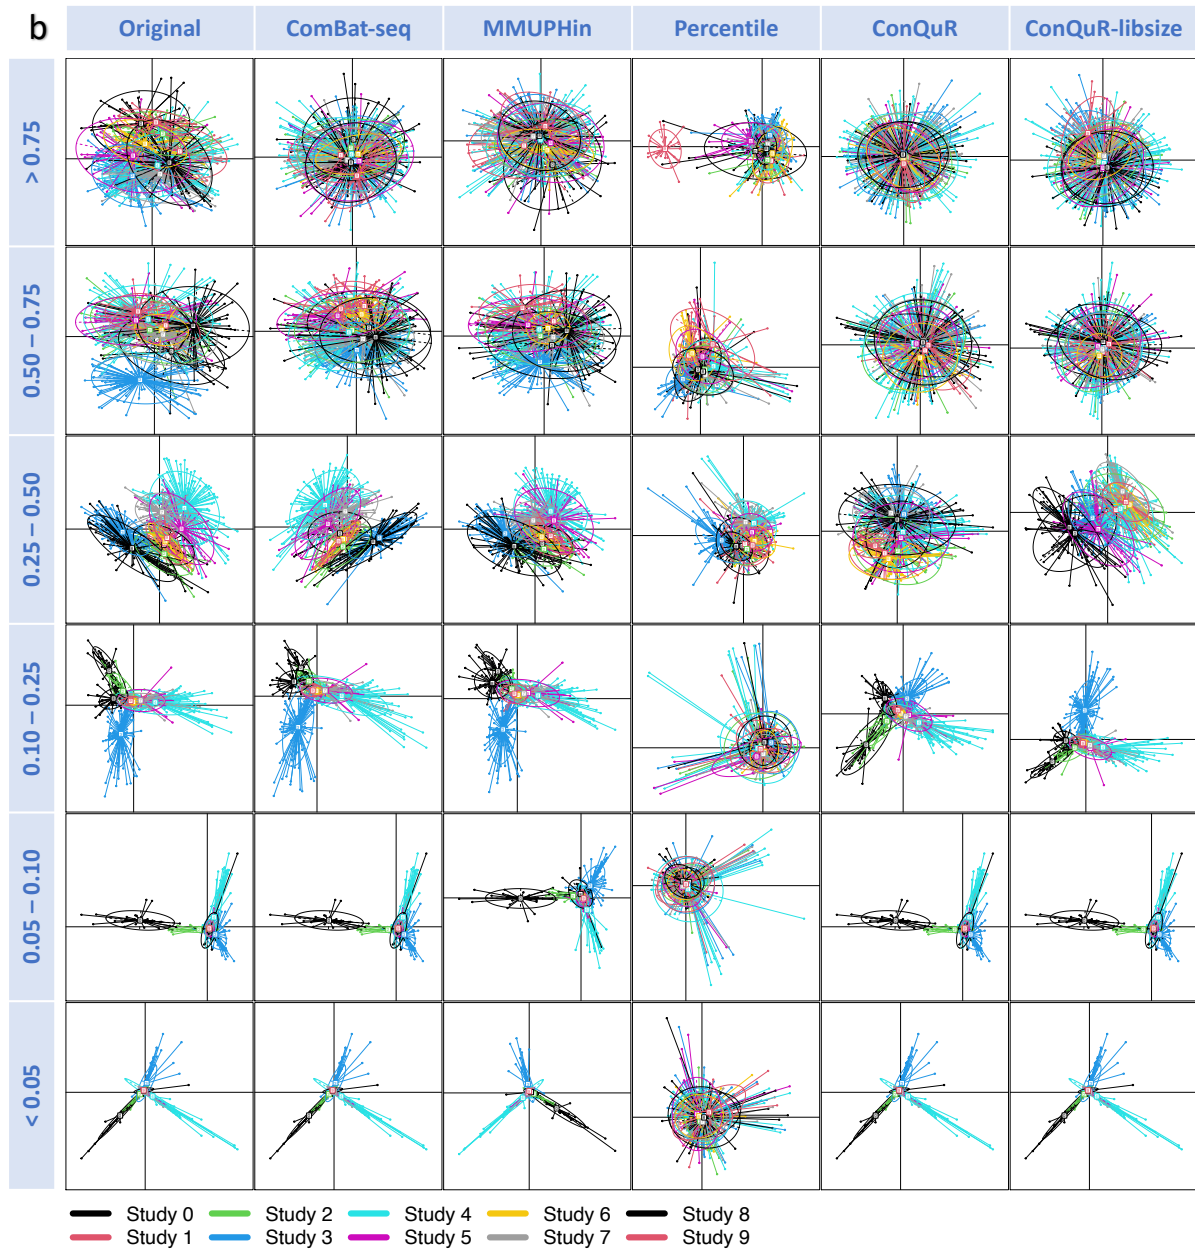

**Supp. Fig. 6 | PCoA plots of HIVRC data clustered by study ID on taxa with different prevalence.** Corresponding colors of the studies are shown at the bottom within the graph. **a**, by Bray-Curtis dissimilarity on raw counts of taxa with prevalence  $>0.75$ ,  $0.5-0.75$ ,  $0.25-0.5$ ,  $0.1-0.25$ ,  $0.05-0.1$ ,  $<0.05$ . Each point represents a sample with non-zero abundance for the taxa (note that fewer samples will have non-zero abundance for rarer taxa). Each ellipse represents a batch with the centroid indicating the mean. As an ellipse connects the 95% percentile of points for each batch, the size of the ellipse indicates the dispersion, and the angle indicates higher-order features of the batch. The more alignment of the ellipses is preferred. **b**, by Aitchison dissimilarity on the corresponding relative abundance of taxa with prevalence  $>0.75$ ,  $0.5-0.75$ ,  $0.25-0.5$ ,  $0.1-0.25$ ,  $0.05-0.1$ ,  $<0.05$ .

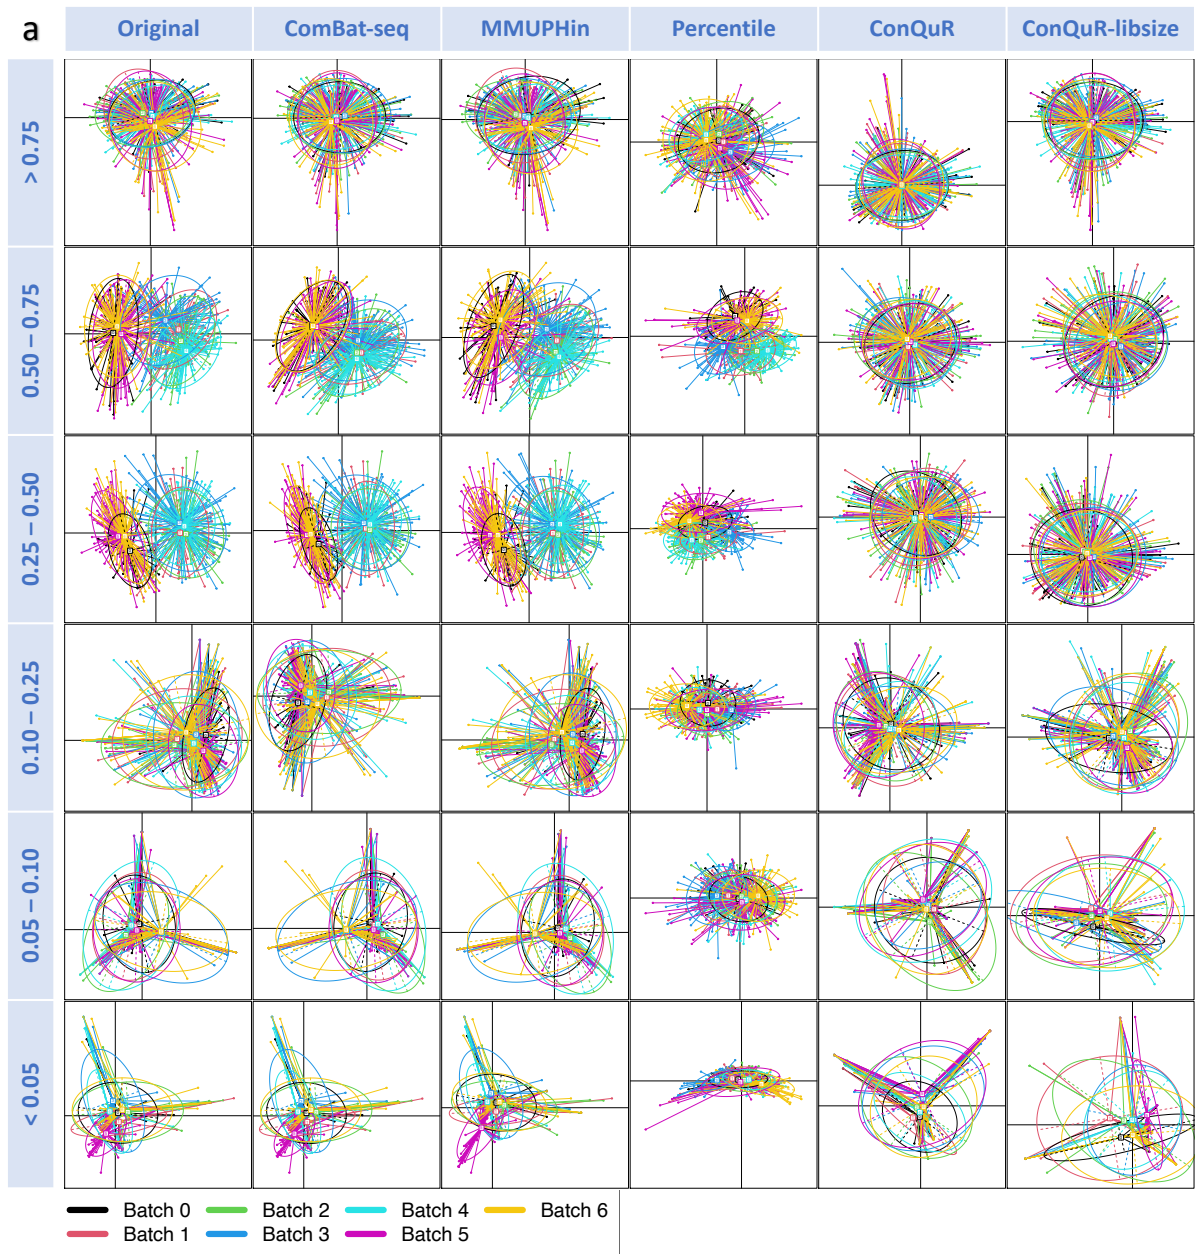

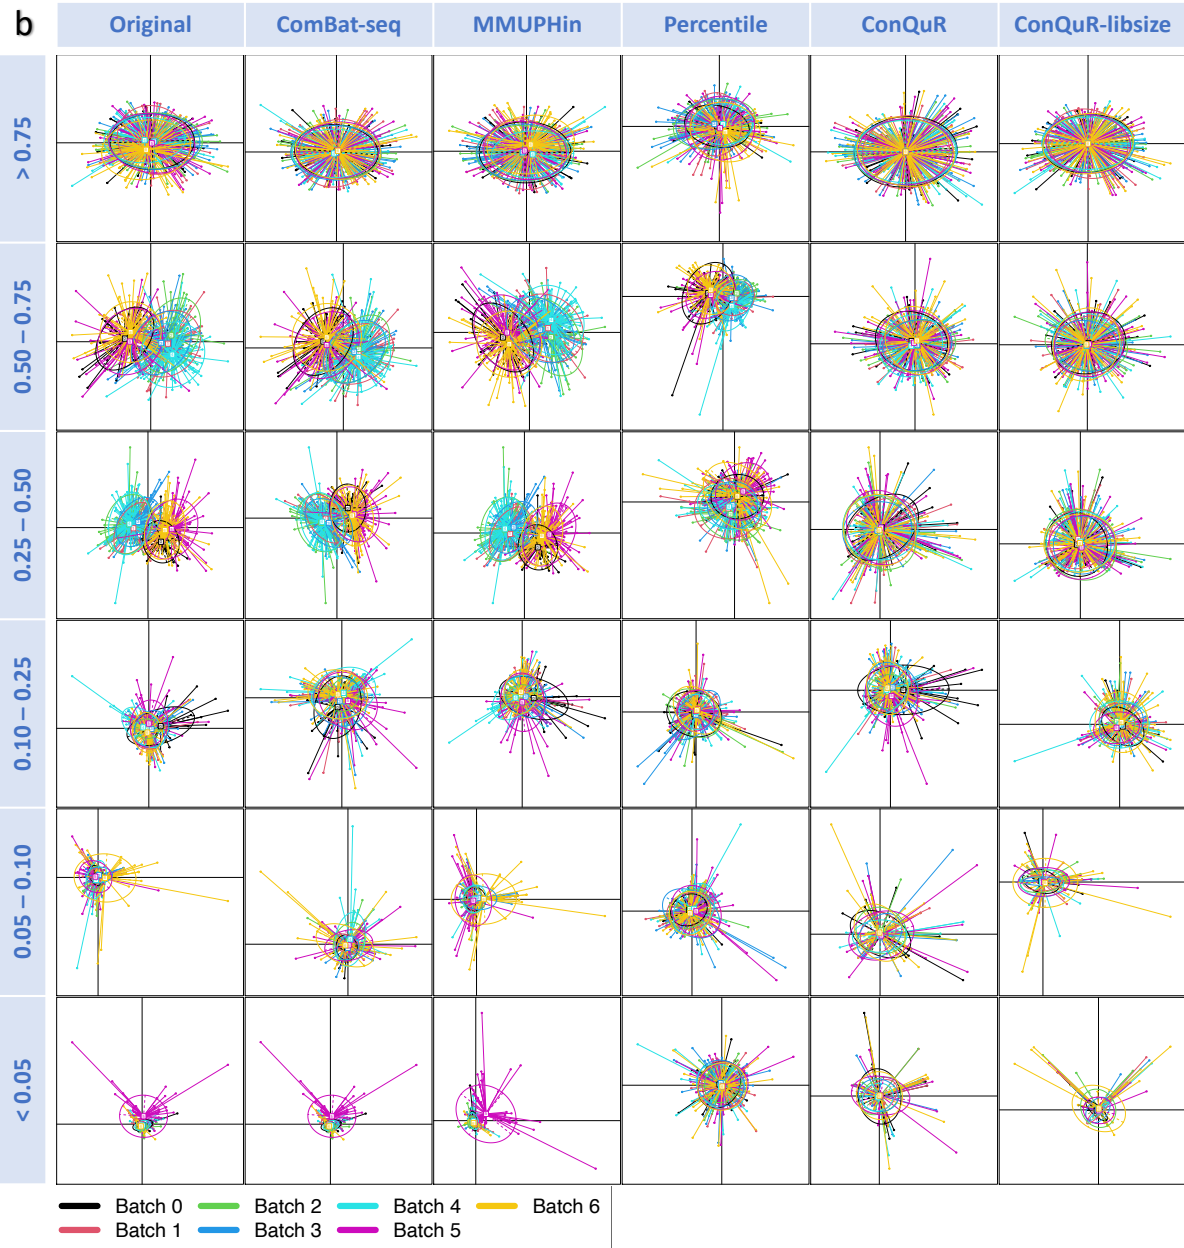

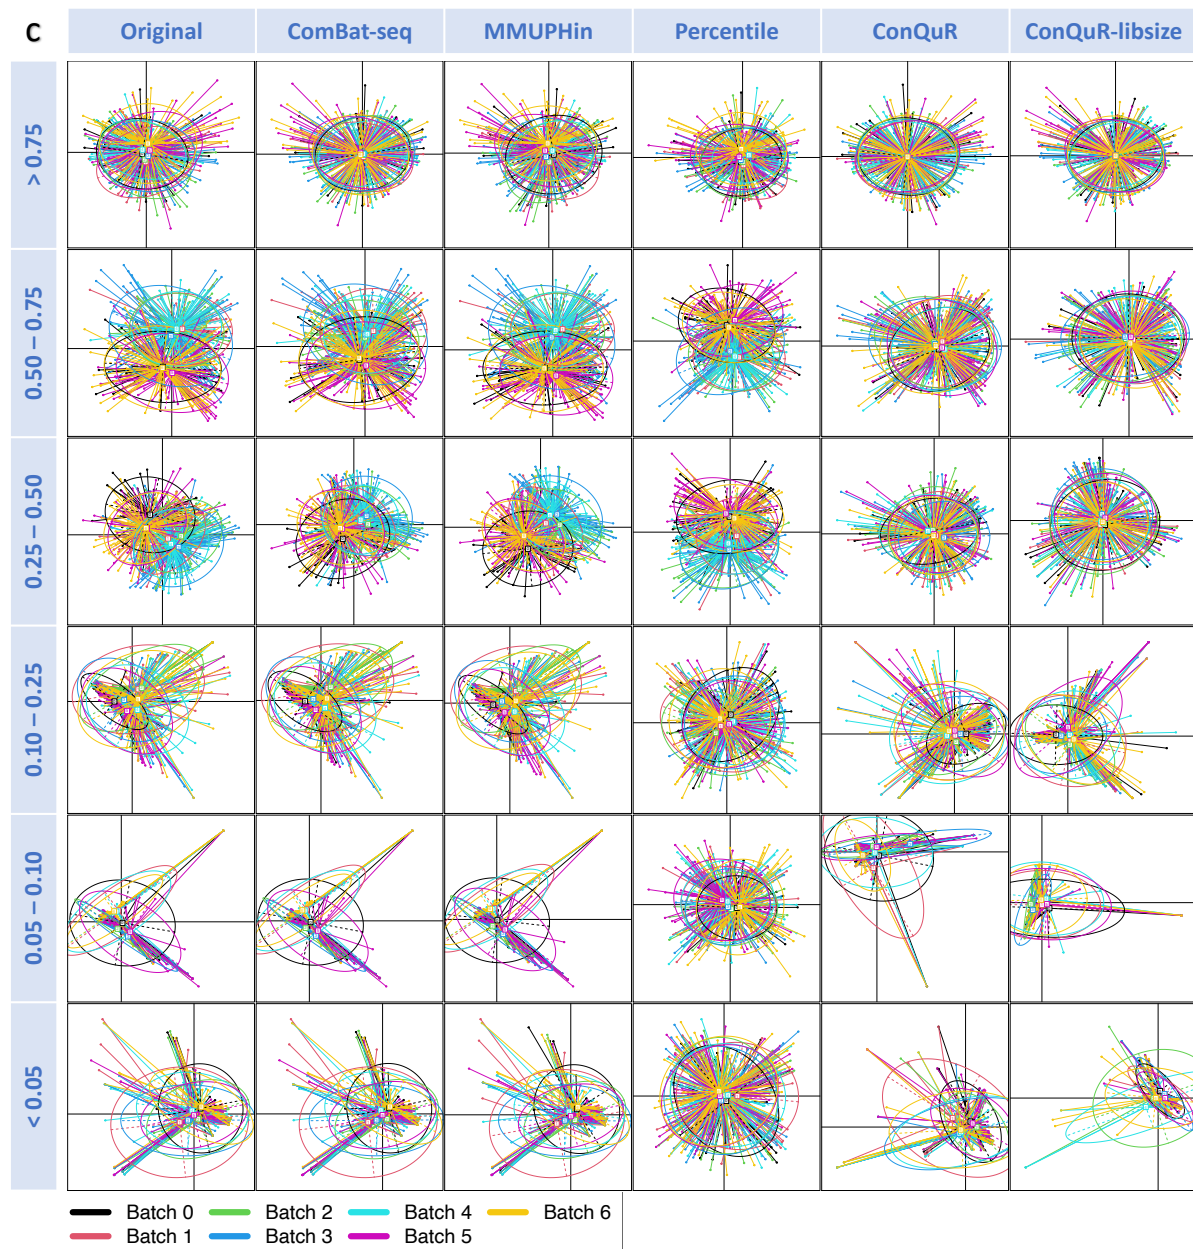

**Supp. Fig. 7 | PCoA plots of MOUTH data clustered by batch ID on taxa with different prevalence.** Corresponding colors of the batches are shown at the bottom within the graph, **a**, by Bray-Curtis dissimilarity on raw counts of taxa with prevalence >0.75, 0.5-0.75, 0.25-0.5, 0.1-0.25, 0.05-0.1, <0.05. Each point represents a sample with non-zero abundance for the taxa (note that fewer samples will have non-zero abundance for rarer taxa). Each ellipse represents a batch with the centroid indicating the mean. As an ellipse connects the 95% percentile of points for each batch, the size of the ellipse indicates the dispersion, and the angle indicates higher-order features of the batch. The more alignment of the ellipses is preferred. **b**, by Aitchison dissimilarity on the corresponding relative abundance of taxa with prevalence >0.75, 0.5-0.75, 0.25-0.5, 0.1-0.25, 0.05-0.1, <0.05. **c**, by GUniFrac dissimilarity

on the corresponding relative abundance of taxa with prevalence  $>0.75$ ,  $0.5-0.75$ ,  $0.25-0.5$ ,  $0.1-0.25$ ,  $0.05-0.1$ ,  $<0.05$ .

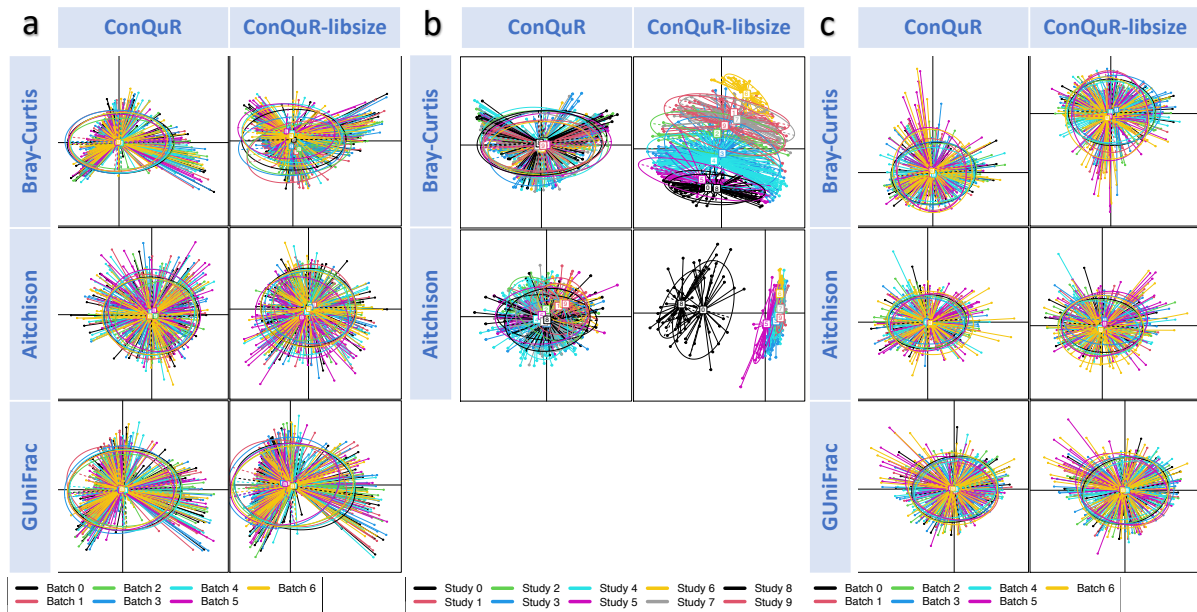

**Supp. Fig. 8 | PCoA plots of corrected data by standard ConQuR and ConQuR-libsize without fine-tuning.** Corresponding colors of the batches/studies are shown at the bottom within the graph. **a**, CARDIA data, by Bray-Curtis dissimilarity on raw counts, Aitchison and GUniFrac dissimilarities on the corresponding relative abundance. Each point represents a sample, and each ellipse represents a batch with the centroid indicating the mean. As an ellipse connects the 95% percentile of points for each batch, the size of the ellipse indicates the dispersion, and the angle indicates higher-order features of the batch. The more alignment of the ellipses is preferred. **b**, HIVRC data, by Bray-Curtis dissimilarity on raw counts, Aitchison dissimilarity on the corresponding relative abundance. **c**, MOUTH data, by Bray-Curtis dissimilarity on raw counts, Aitchison and GUniFrac dissimilarities on the corresponding relative abundance.



**Supp. Tab. 1 | Summary of the 7 runs' microbial profiles and metadata of the CARDIA dataset.**

| Batch ID | Sample size | Library size | # Genera    | SBP<br>(mean (SD)) | Gender<br>= 1 (%) | Race<br>= 1 (%) |
|----------|-------------|--------------|-------------|--------------------|-------------------|-----------------|
| 0        | 96          | 67716-139803 | 258         | 118.00 (16.99)     | 48 (50.0)         | 60 (62.5)       |
| 1        | 89          | 53287-117222 | 241         | 117.82 (13.59)     | 52 (58.4)         | 61 (68.5)       |
| 2        | 90          | 61703-112177 | 237         | 121.11 (15.70)     | 47 (52.2)         | 44 (48.9)       |
| 3        | 82          | 69760-124721 | 262         | 119.21 (14.37)     | 42 (51.2)         | 47 (57.3)       |
| 4        | 94          | 84358-193182 | 259         | 119.55 (17.21)     | 48 (51.1)         | 46 (48.9)       |
| 5        | 94          | 90841-224737 | 280         | 121.35 (17.02)     | 56 (59.6)         | 46 (48.9)       |
| 6        | 88          | 71850-253856 | 277         | 117.94 (17.17)     | 57 (64.8)         | 45 (51.1)       |
|          |             |              | Shared: 183 | p-value=0.585      | p-value=0.329     | p-value=0.034   |

Note: One-way ANOVA test and Pearson's Chi-squared test were used to detect whether there are significant differences in continuous (SBP) and categorical (Gender, Race) metadata, respectively, among the 7 runs.

**Supp. Tab. 2 | Summary of the 10 sub-studies' microbial profiles and metadata of the HIVRC dataset.**

| Study ID | Author                          | Sample size | Library size | # Genera   | HIV status<br>= 1 (%) | Age<br>(mean (SD)) | Gender<br>= 1 (%) | BMI<br>(mean (SD)) |
|----------|---------------------------------|-------------|--------------|------------|-----------------------|--------------------|-------------------|--------------------|
| 0        | Dillon <sup>3</sup>             | 31          | 20000        | 235        | 18 (58.1)             | 35.94 (10.63)      | 10 (32.3)         | 25.18 (4.44)       |
| 1        | Dinh <sup>4</sup>               | 36          | 3500         | 157        | 21 (58.3)             | 47.66 (7.80)       | 8 (22.2)          | 25.45 (3.15)       |
| 2        | Lozupone <sup>5</sup>           | 37          | 5500         | 262        | 24 (64.9)             | 36.21 (10.72)      | 8 (21.6)          | 25.61 (4.84)       |
| 3        | Monaco <sup>6</sup>             | 110         | 194-10000    | 280        | 73 (66.4)             | 39.57 (9.77)       | 63 (57.3)         | 24.33 (4.48)       |
| 4        | Noguera-Julian <sup>7</sup>     | 137         | 10000        | 295        | 122 (89.1)            | 43.28 (10.12)      | 30 (21.9)         | 24.15 (3.02)       |
| 5        | Pinto-Cardoso <sup>8</sup>      | 42          | 15500        | 225        | 33 (78.6)             | 40.19 (10.14)      | 8 (19.0)          | 24.29 (4.09)       |
| 6        | Serrano-Villar <sup>9</sup>     | 43          | 185-1000     | 143        | 34 (79.1)             | 41.79 (10.55)      | 7 (16.3)          | 24.32 (3.11)       |
| 7        | Vesterbacka <sup>10</sup>       | 62          | 4000         | 268        | 47 (75.8)             | 46.94 (9.61)       | 31 (50.0)         | 26.45 (4.32)       |
| 8        | Villanueva-Millan <sup>11</sup> | 50          | 20000        | 351        | 30 (60.0)             | 47.38 (9.49)       | 17 (34.0)         | 25.73 (5.12)       |
| 9        | Villar-Garcia <sup>12</sup>     | 24          | 5000         | 148        | 24 (100.0)            | 45.92 (9.34)       | 3 (12.5)          | 23.58 (3.74)       |
|          |                                 |             |              | Shared: 65 | p-value<0.001         | p-value<0.001      | p-value<0.001     | p-value=0.004      |

Note: One-way ANOVA test and Pearson's Chi-squared test were used to detect whether there are significant differences in continuous (Age, BMI) and categorical (HIV status, Gender) metadata, respectively, among the 10 sub-studies.

**Supp. Tab. 3 | Summary of the 7 runs' microbial profiles and metadata of the MOUTH dataset.**

| Batch ID | Sample size | Library size | # Genera    | HPV status    | Race          |           |           | Sexual orientation |         |           |
|----------|-------------|--------------|-------------|---------------|---------------|-----------|-----------|--------------------|---------|-----------|
|          |             |              |             | = 1 (%)       | = 0 (%)       | 1 (%)     | 2 (%)     | = 0 (%)            | 1 (%)   | 2 (%)     |
| 0        | 42          | 6721-15931   | 156         | 6 (14.3)      | 34 (81.0)     | 5 (11.9)  | 3 (7.1)   | 36 (85.7)          | 3 (7.1) | 3 (7.1)   |
| 1        | 46          | 5340-14342   | 141         | 10 (21.7)     | 38 (82.6)     | 6 (13.0)  | 2 (4.3)   | 41 (89.1)          | 1 (2.2) | 4 (8.7)   |
| 2        | 56          | 7267-16694   | 150         | 8 (14.3)      | 41 (73.2)     | 10 (17.9) | 5 (8.9)   | 49 (87.5)          | 3 (5.4) | 4 (7.1)   |
| 3        | 77          | 5418-13520   | 152         | 6 (7.8)       | 63 (81.8)     | 9 (11.7)  | 5 (6.5)   | 71 (92.2)          | 4 (5.2) | 2 (2.6)   |
| 4        | 89          | 7232-18607   | 179         | 9 (10.1)      | 76 (85.4)     | 9 (10.1)  | 4 (4.5)   | 83 (93.3)          | 3 (3.4) | 3 (3.4)   |
| 5        | 89          | 2670-18610   | 187         | 14 (15.7)     | 50 (56.2)     | 28 (31.5) | 11 (12.4) | 68 (76.4)          | 8 (9.0) | 13 (14.6) |
| 6        | 87          | 6534-21761   | 174         | 13 (14.9)     | 64 (73.6)     | 20 (23.0) | 3 (3.4)   | 74 (85.1)          | 8 (9.2) | 5 (5.7)   |
|          |             |              | Shared: 112 | p-value=0.396 | p-value=0.003 |           |           | p-value=0.104      |         |           |

Note: One-way ANOVA test and Pearson's Chi-squared test were used to detect whether there are significant differences in the categorical (HPV status, Race, Sexual orientation, Smoking status) metadata among the 7 runs.

**Supp. Tab. 3 (cont.) | Summary of the 7 runs' microbial profiles and metadata of the MOUTH dataset.**

| Batch ID | Sample size | Smoking status |           |           |
|----------|-------------|----------------|-----------|-----------|
|          |             | = 0 (%)        | 1 (%)     | 2 (%)     |
| 0        | 42          | 24 (57.1)      | 14 (33.3) | 4 (9.5)   |
| 1        | 46          | 29 (63.0)      | 12 (26.1) | 5 (10.9)  |
| 2        | 56          | 31 (55.4)      | 20 (35.7) | 5 (8.9)   |
| 3        | 77          | 46 (59.7)      | 25 (32.5) | 6 (7.8)   |
| 4        | 89          | 55 (61.8)      | 25 (28.1) | 9 (10.1)  |
| 5        | 89          | 50 (56.2)      | 23 (25.8) | 16 (18.0) |
| 6        | 87          | 45 (51.7)      | 27 (31.0) | 15 (17.2) |
|          |             | p-value=0.661  |           |           |

Note: One-way ANOVA test and Pearson's Chi-squared test were used to detect whether there are significant differences in the categorial (HPV status, Race, Sexual orientation, Smoking status) metadata among the 7 runs.

**Supp. Tab. 4 | Fitting strategies selected for taxa with different prevalence by fine-tuned ConQuR and ConQuR-libsizes on the CARDIA data.**

|                   | 0 – 0.1 | 0.1 – 0.2 | 0.2 – 0.3 | 0.3 – 0.4 | 0.4 – 0.5 | 0.5 – 0.6 | 0.6 – 0.7 | 0.7 – 0.8 | 0.8 – 0.9 | 0.9 - 1 |
|-------------------|---------|-----------|-----------|-----------|-----------|-----------|-----------|-----------|-----------|---------|
| Original          | X       |           |           |           |           |           |           |           |           |         |
| QQ                |         |           |           |           |           |           |           | X         | X         | X       |
| Logistic<br>Lasso |         | X         | X         | X         | X         |           |           |           |           |         |
| Quantile type     |         | Lasso     | Lasso     | Lasso     | Lasso     | Lasso     | Lasso     |           |           |         |
| Lambda            |         | 2p/n      | 2p/n      | 2p/n      | 2p/n      | 2p/n      | 2p/n      |           |           |         |
| Interpolation     |         |           |           |           | X         | X         | X         |           |           |         |

Note: To interpret the model, e.g., for taxa with prevalence  $< 0.1$  in CARDIA, the optimal choice is to keep the original data; for taxa with  $0.1 < \text{prevalence} < 0.2$ , ConQuR / ConQuR-libsizes with logistic-LASSO, quantile-LASSO (with  $\lambda = \frac{2p}{n}$ ), without interpolation in the piece-wise estimation strategy is selected; for taxa with  $0.5 < \text{prevalence} < 0.6$ , ConQuR / ConQuR-libsizes with standard logistic, quantile-LASSO (with  $\lambda = \frac{2p}{n}$ ), with interpolation in the piece-wise estimation strategy is selected; for taxa with  $0.7 < \text{prevalence} < 0.8$ , ConQuR / ConQuR-libsizes with simple quantile-quantile matching is selected.

**Supp. Tab. 5 | Fitting strategies selected for taxa with different prevalence by fine-tuned ConQuR and ConQuR-libsiz on the HIVRC data.**

|                   | 0 – 0.1 | 0.1 – 0.2    | 0.2 – 0.3    | 0.3 – 0.4 | 0.4 – 0.5    | 0.5 – 0.6 | 0.6 – 0.7    | 0.7 – 0.8 | 0.8 – 0.9 | 0.9 - 1 |
|-------------------|---------|--------------|--------------|-----------|--------------|-----------|--------------|-----------|-----------|---------|
| Original          | X       |              |              |           |              |           |              |           |           |         |
| QQ                |         |              |              |           |              |           |              |           |           | X       |
| Logistic<br>Lasso |         | X            | X            | X         | X            |           | X            | X         |           |         |
| Quantile type     |         | Lasso        | composite    | composite | Lasso        | Lasso     | Lasso        | Lasso     | Lasso     |         |
| Lambda            |         | $2p/\log(n)$ | $2p/\log(n)$ | $2p/n$    | $2p/\log(n)$ | $2p/n$    | $2p/\log(n)$ | $2p/n$    | $2p/n$    |         |
| Interpolation     |         |              |              |           |              |           |              | X         |           |         |

Note: To interpret the model, e.g., for taxa with prevalence  $< 0.1$  in HIVRC, the optimal choice is to keep the original data; for taxa with  $0.1 < \text{prevalence} < 0.2$ , ConQuR / ConQuR-libsiz with logistic-LASSO, quantile-LASSO (with  $\lambda = \frac{2p}{\log n}$ ), without interpolation in the piece-wise estimation strategy is selected; for taxa with  $0.2 < \text{prevalence} < 0.3$ , ConQuR / ConQuR-libsiz with logistic-LASSO, composite quantile (with  $\lambda = \frac{2p}{\log n}$ ), without interpolation in the piece-wise estimation strategy is selected; similarly for the remaining intervals of prevalence.

**Supp. Tab. 6 | Fitting strategies selected for taxa with different prevalence by fine-tuned ConQuR and ConQuR-libsizе on the MOUTH data.**

|                   | 0 – 0.1 | 0.1 – 0.2    | 0.2 – 0.3 | 0.3 – 0.4    | 0.4 – 0.5 | 0.5 – 0.6    | 0.6 – 0.7    | 0.7 – 0.8 | 0.8 – 0.9 | 0.9 - 1 |
|-------------------|---------|--------------|-----------|--------------|-----------|--------------|--------------|-----------|-----------|---------|
| Original          |         |              |           |              |           |              |              |           |           |         |
| QQ                |         |              |           |              |           |              |              |           | X         | X       |
| Logistic<br>Lasso |         | X            | X         |              |           |              | X            |           |           |         |
| Quantile type     | Lasso   | Lasso        | Lasso     | Lasso        | Lasso     | Lasso        | Lasso        | Lasso     |           |         |
| Lambda            | $2p/n$  | $2p/\log(n)$ | $2p/n$    | $2p/\log(n)$ | $2p/n$    | $2p/\log(n)$ | $2p/\log(n)$ | $2p/n$    |           |         |
| Interpolation     |         |              | X         |              |           | X            | X            | X         |           |         |

Note: To interpret the model, e.g., for taxa with prevalence  $< 0.1$  in MOUTH, ConQuR / ConQuR-libsizе with standard logistic, quantile-LASSO (with  $\lambda = \frac{2p}{n}$ ), without interpolation in the piece-wise estimation strategy is selected; for taxa with  $0.1 < \text{prevalence} < 0.2$ , ConQuR / ConQuR-libsizе with logistic-LASSO, quantile-LASSO (with  $\lambda = \frac{2p}{\log n}$ ), without interpolation in the piece-wise estimation strategy is selected; for taxa with  $0.2 < \text{prevalence} < 0.3$ , ConQuR / ConQuR-libsizе with logistic-LASSO, quantile-LASSO (with  $\lambda = \frac{2p}{n}$ ), with interpolation in the piece-wise estimation strategy is selected; similarly for the remaining intervals of prevalence.

## References

1. Machado, J.A.F. & Silva, J.S. Quantiles for counts. *Journal of the American Statistical Association* **100**, 1226-1237 (2005).
2. Ling, W., Cheng, B., Wei, Y., Willey, J.Z. & Cheung, Y.K. Statistical inference in quantile regression for zero-inflated outcomes. *Statistica Sinica* **32**, 1411-1433 (2022).
3. Dillon, S. et al. An altered intestinal mucosal microbiome in HIV-1 infection is associated with mucosal and systemic immune activation and endotoxemia. *Mucosal immunology* **7**, 983-994 (2014).
4. Dinh, D.M. et al. Intestinal microbiota, microbial translocation, and systemic inflammation in chronic HIV infection. *The Journal of infectious diseases* **211**, 19-27 (2015).
5. Lozupone, C.A. et al. Alterations in the gut microbiota associated with HIV-1 infection. *Cell host & microbe* **14**, 329-339 (2013).
6. Monaco, C.L. et al. Altered virome and bacterial microbiome in human immunodeficiency virus-associated acquired immunodeficiency syndrome. *Cell host & microbe* **19**, 311-322 (2016).
7. Noguera-Julian, M. et al. Gut microbiota linked to sexual preference and HIV infection. *EBioMedicine* **5**, 135-146 (2016).
8. Pinto-Cardoso, S. et al. Fecal bacterial communities in treated HIV infected individuals on two antiretroviral regimens. *Scientific reports* **7**, 1-10 (2017).
9. Serrano-Villar, S. et al. The effects of prebiotics on microbial dysbiosis, butyrate production and immunity in HIV-infected subjects. *Mucosal immunology* **10**, 1279-1293 (2017).
10. Vesterbacka, J. et al. (Nature Publishing Group, 2017).
11. Villanueva-Millán, M.J., Pérez-Matute, P., Recio-Fernández, E., Lezana Rosales, J.M. & Oteo, J.A. Differential effects of antiretrovirals on microbial translocation and gut microbiota composition of HIV-infected patients. *Journal of the International AIDS Society* **20**, 21526 (2017).
12. Villar-Garcia, J. et al. Impact of probiotic *Saccharomyces boulardii* on the gut microbiome composition in HIV-treated patients: a double-blind, randomised, placebo-controlled trial. *PloS one* **12**, e0173802 (2017).
